# Supplementary material
Source: publisher figshare collection journal article supplement (https://karger.figshare.com/ndownloader/files/14537183)
Supplement: Supplementary file 1 [file 14537183]

| **n (%)** | | **Location** | | | | | |
| --- | --- | --- | --- | --- | --- | --- | --- |
| **Cecum** | **Ascending** | **Transvers** | **Descending** | **Sigmoid** | **Rectum** |
| **L-menthol + CO2I n=153** | |  |  |  |  |  |  |
| **1st** | 153 (100.0) | 153 (100) | 0 | 0 | 0 | 0 | 0 |
| **2nd** | 16 (10.5) | 0 | 1 (0.7) | 1 (0.7) | 4 (2.6) | 10 (6.5) | 0 |
| **L-menthol + AI n=156** | |  |  |  |  |  |  |
| **1st** | 156 (100.0) | 156 (100) | 0 | 0 | 0 | 0 | 0 |
| **2nd** | 10 (6.4) | 0 | 1 (0.6) | 2 (1.3) | 0 | 7 (4.5) | 0 |
| **3rd** | 1 (0.6) | 0 | 0 | 0 | 0 | 1 (0.6) | 0 |
| **CO2I n=153** | |  |  |  |  |  |  |
| **1st** | 153 (100.0) | 153 (100) | 0 | 0 | 0 | 0 | 0 |
| **Al n=149** | |  |  |  |  |  |  |
| **1st** | 149 (100.0) | 149 (100) | 0 | 0 | 0 | 0 | 0 |

Supplementary Table 1

CO2I ; Carbon dioxide insufflation, , AI ; Air insufflation
